# Supplementary material for: Transcranial Ultrasound Stimulation of the Anterior Cingulate Cortex Reduces Neuropathic Pain in Mice
Source: Hindawi journal article supplement (doi:10.1155/2021/6510383), 2021-12-31
Supplement: f1 [file 6510383.f1.pdf]

Table S1 cytoHubba function results

| node_name | MC C | MN C | Degree | BottleNeck | EcCentricity | Closeness | ClusteringCoefficient |
|-----------|------|------|--------|------------|--------------|-----------|-----------------------|
| Hnrnp1    | 5189 | 13   | 14     | 7          | 0.07037      | 23.67143  | 0.37363               |
| Hnrnpd    | 5167 | 9    | 10     | 4          | 0.07037      | 21.17143  | 0.6                   |
| Snrpb     | 5178 | 10   | 10     | 1          | 0.07037      | 21.42143  | 0.66667               |
| Dhx16     | 5053 | 9    | 10     | 5          | 0.07037      | 21.25476  | 0.55556               |
| Cpsf2     | 5047 | 8    | 9      | 57         | 0.07917      | 21.75119  | 0.63889               |
| Xab2      | 5166 | 9    | 9      | 3          | 0.07037      | 20.50476  | 0.75                  |
| Khdrbs1   | 23   | 7    | 8      | 2          | 0.06333      | 19.08889  | 0.32143               |
| Snrnp40   | 5160 | 8    | 8      | 1          | 0.07037      | 20.00476  | 0.89286               |
| H2afz     | 8    | 3    | 7      | 9          | 0.06333      | 15.84087  | 0.09524               |
| Aqr       | 5040 | 7    | 7      | 1          | 0.07037      | 19.50476  | 1                     |
| Ddx17     | 19   | 5    | 6      | 3          | 0.06333      | 18.42222  | 0.46667               |
| Gnb1      | 6    | 1    | 6      | 57         | 0.09048      | 19.6119   | 0                     |
| Hnrnpab   | 120  | 5    | 5      | 1          | 0.06333      | 17.33889  | 1                     |
| Atp5e     | 30   | 5    | 5      | 1          | 0.03056      | 6.66667   | 0.8                   |
| Ndufa2    | 30   | 5    | 5      | 2          | 0.03056      | 6.66667   | 0.8                   |
| Ndufa8    | 25   | 4    | 5      | 11         | 0.04074      | 7.16667   | 0.6                   |
| Ndufs5    | 30   | 5    | 5      | 1          | 0.03056      | 6.66667   | 0.8                   |
| Cryab     | 4    | 2    | 4      | 3          | 0.07917      | 15.1619   | 0.33333               |
| Sod1      | 5    | 3    | 4      | 12         | 0.09048      | 17.47143  | 0.33333               |
| Snca      | 5    | 3    | 4      | 1          | 0.07917      | 16.41429  | 0.33333               |
| Rbfox3    | 4    | 2    | 4      | 7          | 0.07917      | 15.62857  | 0.33333               |
| Ndufs4    | 24   | 4    | 4      | 1          | 0.03056      | 6.16667   | 1                     |
| Dnaj1     | 4    | 3    | 3      | 1          | 0.07037      | 13.97817  | 0.66667               |
| Ppil2     | 6    | 3    | 3      | 1          | 0.07037      | 16.2881   | 1                     |
| Ewsr1     | 6    | 3    | 3      | 1          | 0.06333      | 16.42222  | 1                     |

|         |   |   |   |    |         |              |         |
|---------|---|---|---|----|---------|--------------|---------|
| Dnajb6  | 4 | 3 | 3 | 2  | 0.07037 | 13.978<br>17 | 0.66667 |
| Dnajb4  | 3 | 2 | 3 | 4  | 0.07917 | 15.513<br>1  | 0.33333 |
| Timm13  | 6 | 3 | 3 | 1  | 0.02444 | 5.2333<br>3  | 1       |
| Nme1    | 3 | 1 | 3 | 57 | 0.10556 | 18.783<br>33 | 0       |
| Ppp1r1b | 3 | 2 | 3 | 2  | 0.07037 | 13.182<br>54 | 0.33333 |
| Atrx    | 4 | 3 | 3 | 1  | 0.05758 | 12.258<br>04 | 0.66667 |
| Pvalb   | 3 | 2 | 3 | 4  | 0.07037 | 13.432<br>54 | 0.33333 |
| Suclg1  | 3 | 1 | 3 | 11 | 0.04074 | 6.3333<br>3  | 0       |
| Sec61a1 | 3 | 1 | 3 | 4  | 0.04444 | 3            | 0       |
| Krt10   | 3 | 2 | 3 | 2  | 0.04444 | 3            | 0.33333 |
| Chp1    | 2 | 1 | 2 | 2  | 0.05758 | 9.8584<br>8  | 0       |
| Rbm14   | 2 | 2 | 2 | 1  | 0.06333 | 15.672<br>22 | 1       |
| Ace     | 2 | 1 | 2 | 3  | 0.03333 | 2            | 0       |
| Sncb    | 2 | 1 | 2 | 3  | 0.03333 | 2            | 0       |
| Hmgb1   | 2 | 1 | 2 | 2  | 0.05758 | 11.924<br>71 | 0       |
| Prkar1a | 2 | 1 | 2 | 4  | 0.07917 | 14.979<br>76 | 0       |
| Capn7   | 2 | 1 | 2 | 3  | 0.03333 | 2            | 0       |
